# Supplementary material
Source: PubMed Central journal article supplement (PMC2896766)
Supplement: mmc1.pdf [file mmc1.pdf]

## Supplemental Data

# Spoiling the Whole Bunch: Quality Control Aimed at Preserving the Integrity of High-Throughput Genotyping

Anna Pluzhnikov, Jennifer E. Below, Anuar Konkashbaev, Anna Tikhomirov, Emily Kistner-Griffin, Cheryl A. Roe, Dan L. Nicolae, and Nancy J. Cox

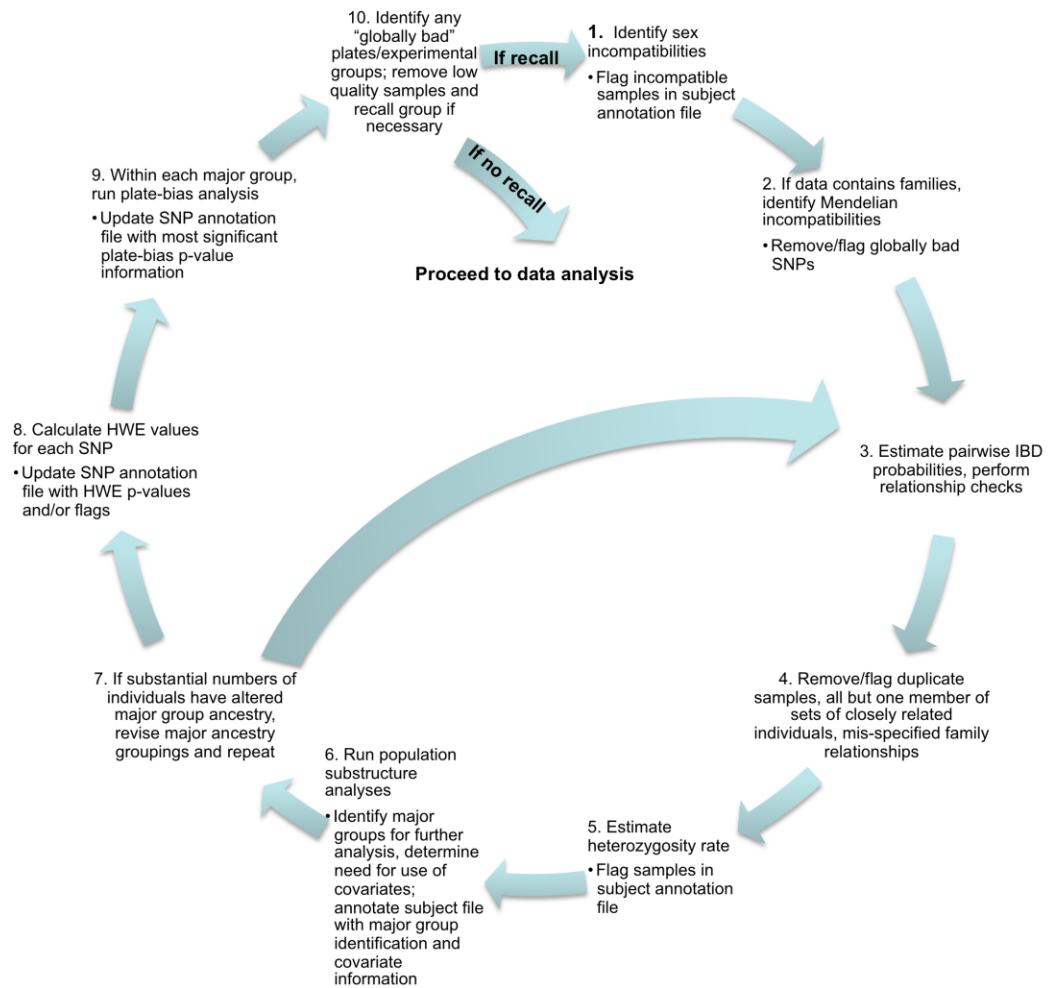

Figure S1.

Flow chart of recommended quality control measures.

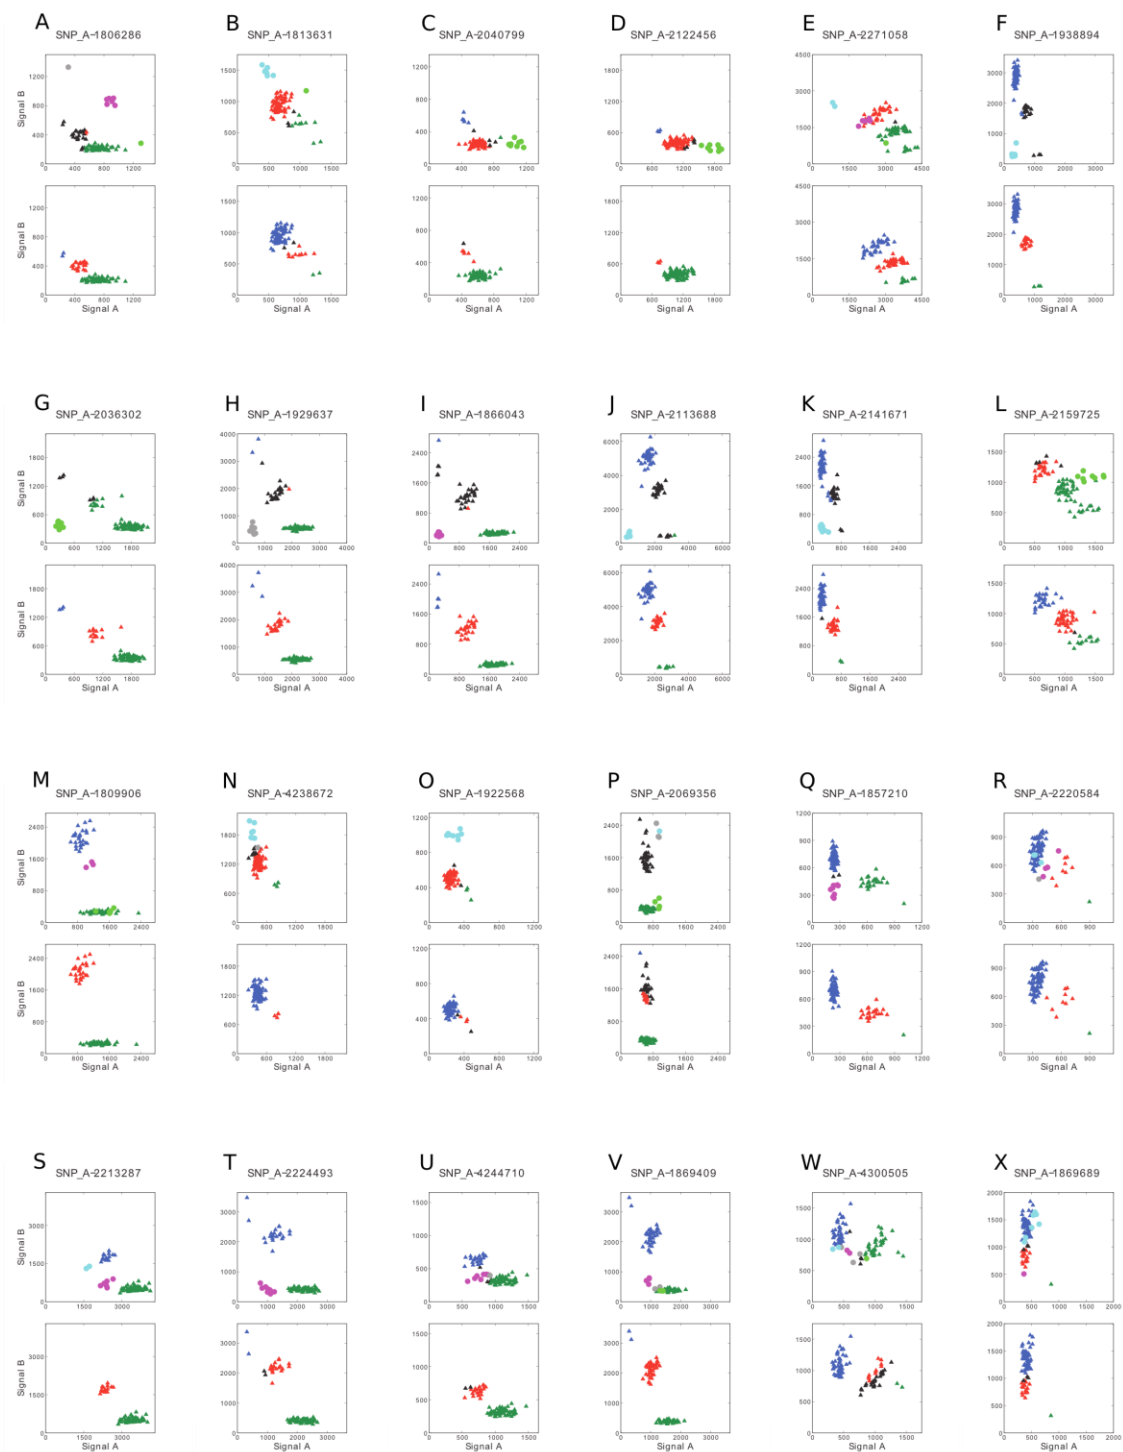

Figure S2.

Normalized signal intensity plots for the rest of the SNPs that retain a highly significant

plate bias (P-value <  $10^{-7}$ ) upon removal of eight problem samples, but before the recall. Panels (A)-(E) correspond to Nsp-specific SNPs, (F)-(K), to Sty-specific, and (L)-(X), to Nsp/Sty SNPs.

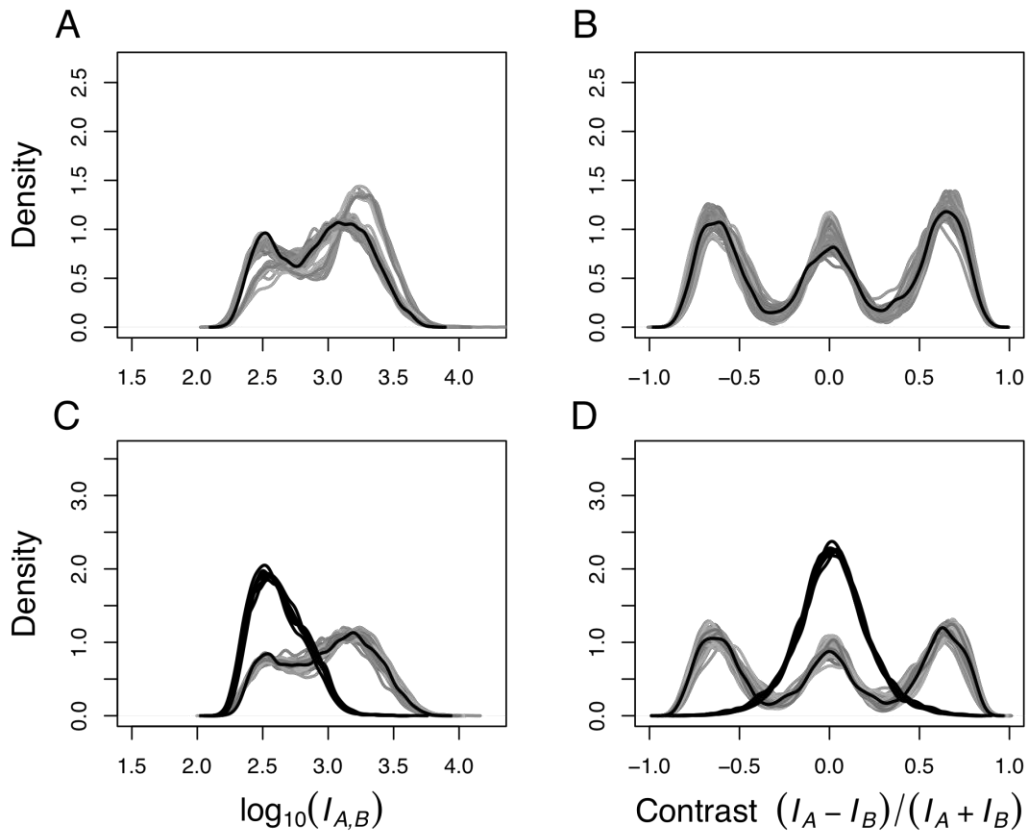

Figure S3.

Log-transformed *normalized* probe intensity and contrast distributions for the samples on plate 4RWG569. As in Figure 3, the top row corresponds to the panel of Nsp-specific, and the bottom row, Sty-specific SNPs. Solid black curves representing the eight samples with Sty target preparation failure remain completely distinct. However, in contrast to Figure 3, the sample identified by SQC and CQC as failing on both Sty and Nsp panels appears “normal” in all four plots.

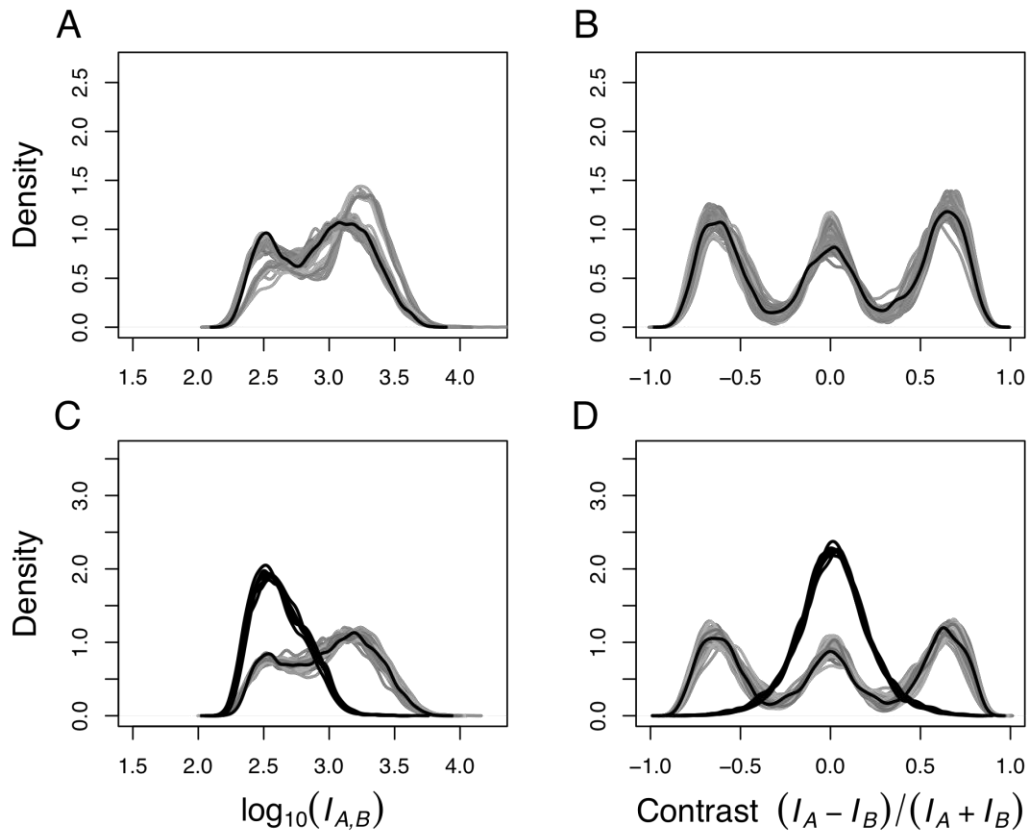

Figure S4.

Restriction fragment length distribution of the full (A,C) and CQC panel (B,D) set of enzyme-specific probes. The top row corresponds to Nsp, and the bottom row, to Sty enzyme.

| GoKinD ID | Plate ID          | SQC panel   |             | SQC all     |             | CQC panel    |              |              |              | CQC all      |              |              |              |
|-----------|-------------------|-------------|-------------|-------------|-------------|--------------|--------------|--------------|--------------|--------------|--------------|--------------|--------------|
|           |                   | score       | Nsp         | score       | Sty         | score        | Nsp          | score        | Sty          | score        | random       | score        | Nsp          |
| G325      | 4RWG569           | -0.19       | <b>0.20</b> | -0.14       | <b>0.18</b> | <b>0.00</b>  | 1.72         | 3.99         | <b>-0.07</b> | <b>0.00</b>  | 1.39         | 3.56         | <b>-0.02</b> |
| G306      | 4RWG569           | -0.19       | <b>0.14</b> | -0.15       | <b>0.13</b> | <b>0.00</b>  | 1.59         | 3.94         | <b>0.00</b>  | <b>0.00</b>  | 1.26         | 3.30         | <b>-0.01</b> |
| G537      | 4RWG569           | -0.14       | <b>0.17</b> | -0.08       | <b>0.17</b> | <b>0.00</b>  | 1.43         | 3.62         | <b>-0.10</b> | <b>0.00</b>  | 1.15         | 2.93         | <b>-0.02</b> |
| G544      | 4RWG569           | -0.12       | <b>0.18</b> | -0.08       | <b>0.17</b> | <b>0.00</b>  | 1.30         | 4.39         | <b>-0.03</b> | <b>0.00</b>  | 1.07         | 2.87         | <b>-0.02</b> |
| G1987     | 4RWG569           | -0.21       | <b>0.17</b> | -0.14       | <b>0.16</b> | <b>0.00</b>  | 1.40         | 4.39         | <b>-0.10</b> | <b>0.00</b>  | 1.31         | 3.42         | <b>-0.04</b> |
| G540      | 4RWG569           | -0.23       | <b>0.15</b> | -0.17       | <b>0.15</b> | <b>0.00</b>  | 1.27         | 4.19         | <b>-0.03</b> | <b>0.00</b>  | 1.46         | 3.68         | <b>-0.01</b> |
| G585      | 4RWG569           | -0.16       | <b>0.16</b> | -0.15       | <b>0.17</b> | <b>0.00</b>  | 2.03         | 3.99         | <b>0.00</b>  | <b>0.00</b>  | 1.49         | 3.70         | <b>-0.01</b> |
| G602      | 4RWG569           | -0.13       | <b>0.15</b> | -0.10       | <b>0.16</b> | <b>0.00</b>  | 1.43         | 4.19         | <b>-0.03</b> | <b>0.00</b>  | 1.26         | 3.29         | <b>-0.04</b> |
| G139      | 4RWG569           | <b>0.12</b> | <b>0.11</b> | <b>0.16</b> | <b>0.19</b> | <b>-0.10</b> | <b>-0.10</b> | 1.22         | 1.76         | <b>-0.13</b> | <b>-0.13</b> | <b>-0.29</b> | <b>-0.11</b> |
| G895      | 3KYJ479           | -0.14       | <b>0.15</b> | -0.14       | <b>0.13</b> | <b>0.00</b>  | 1.75         | 3.82         | <b>0.00</b>  | <b>0.00</b>  | 1.43         | 3.46         | <b>-0.04</b> |
| G925      | 3KYJ479           | -0.14       | <b>0.12</b> | -0.14       | <b>0.13</b> | <b>0.00</b>  | 0.92         | 3.48         | <b>0.00</b>  | <b>0.00</b>  | 1.25         | 3.39         | <b>-0.01</b> |
| G5911     | 1CWO500           | <b>0.11</b> | -0.07       | <b>0.15</b> | 0.07        | <b>0.35</b>  | <b>0.35</b>  | 0.88         | 2.41         | 0.79         | 0.79         | <b>0.26</b>  | <b>0.34</b>  |
| G1062*    | 5GBM583           | 0.07        | -0.04       | <b>0.13</b> | -0.01       | <b>0.00</b>  | <b>0.00</b>  | <b>-0.51</b> | 2.54         | <b>-0.15</b> | <b>-0.15</b> | <b>-0.20</b> | 1.44         |
| G4663     | 1URP242           | <b>0.15</b> | -0.02       | <b>0.19</b> | <b>0.14</b> | <b>0.10</b>  | <b>0.10</b>  | 0.62         | 2.34         | 0.56         | 0.56         | <b>0.12</b>  | <b>0.09</b>  |
| G816      | 9RHL593           | -0.17       | -0.14       | 0.09        | <b>0.11</b> | <b>0.06</b>  | <b>0.06</b>  | 4.30         | 3.79         | <b>0.33</b>  | <b>0.33</b>  | <b>0.23</b>  | <b>-0.16</b> |
| G1370     | 1SHK635           | -0.04       | -0.11       | -0.06       | -0.03       | <b>0.00</b>  | 2.86         | 2.41         | 4.54         | 3.08         | 3.08         | 3.09         | 2.38         |
| G5610     | 9QYW461           | 0.06        | -0.05       | -0.06       | -0.06       | <b>0.00</b>  | 2.86         | -1.64        | 2.68         | 2.28         | 2.28         | 2.28         | 2.03         |
| G4450     | 9RHL593           | -0.02       | -0.01       | 0.01        | 0.00        | <b>-0.38</b> | <b>-0.38</b> | 1.39         | 1.49         | 0.56         | 0.56         | 0.50         | <b>-0.02</b> |
| G935      | 9RHL593           | -0.08       | -0.07       | -0.06       | -0.06       | <b>0.13</b>  | <b>0.13</b>  | 1.05         | 0.91         | <b>0.33</b>  | <b>0.33</b>  | <b>0.40</b>  | <b>0.00</b>  |
| G5065     | 9RHL593           | -0.07       | -0.08       | -0.06       | -0.05       | <b>0.35</b>  | <b>0.35</b>  | 1.61         | 1.42         | 0.94         | 0.94         | 0.92         | 0.54         |
| G4065     | 9RHL593           | -0.07       | -0.07       | -0.06       | -0.06       | <b>0.35</b>  | <b>0.35</b>  | 1.33         | 0.64         | 0.53         | 0.53         | 0.46         | <b>0.13</b>  |
| G5729     | 5XAV049           | 0.08        | -0.07       | <b>0.15</b> | <b>0.10</b> | <b>0.00</b>  | 1.18         | 1.44         | 4.57         | 1.25         | 1.25         | 0.68         | 0.91         |
| G3379     | 9GXO476           | 0.04        | -0.07       | 0.05        | 0.04        | <b>0.00</b>  | 0.99         | 0.99         | 3.08         | 1.04         | 1.04         | 0.82         | <b>0.23</b>  |
| G3563     | 9GXO476           | 0.07        | 0.05        | 0.08        | <b>0.11</b> | 0.57         | 0.57         | 0.71         | 0.78         | 0.52         | 0.52         | 0.59         | <b>0.00</b>  |
| NA12144   | 8WWR250           | 0.04        | -0.03       | -0.06       | -0.03       | <b>0.00</b>  | 2.73         | 0.96         | 3.01         | 2.78         | 2.78         | 2.76         | 1.89         |
| G1099     | 7FDZ321           | <b>0.10</b> | 0.05        | 0.09        | <b>0.10</b> | 0.79         | 0.79         | 0.93         | 1.93         | 0.62         | 0.62         | 0.50         | <b>-0.01</b> |
| G2279     | 7FDZ321           | 0.08        | 0.01        | 0.06        | 0.07        | <b>0.10</b>  | <b>0.10</b>  | 1.39         | 1.49         | 0.63         | 0.63         | 0.55         | <b>0.14</b>  |
| G4097     | 9RHL593           | -0.16       | -0.12       | 0.07        | 0.09        | <b>0.19</b>  | <b>0.19</b>  | 4.33         | 3.46         | <b>0.40</b>  | <b>0.40</b>  | <b>0.38</b>  | <b>0.00</b>  |
| G3433     | 9RHL593           | -0.19       | -0.16       | 0.07        | 0.09        | <b>0.16</b>  | <b>0.16</b>  | 4.70         | 3.56         | 0.72         | 0.72         | 0.74         | <b>0.00</b>  |
| G2450     | 9RHL593           | -0.20       | -0.14       | 0.06        | 0.08        | <b>0.32</b>  | <b>0.32</b>  | 3.99         | 3.22         | 0.65         | 0.65         | 0.74         | <b>0.00</b>  |
| G718      | 9RHL593           | -0.16       | -0.10       | 0.07        | 0.08        | <b>0.16</b>  | <b>0.16</b>  | 4.45         | 3.29         | <b>0.30</b>  | <b>0.30</b>  | <b>0.26</b>  | <b>-0.21</b> |
| G3625     | 9RHL593           | -0.16       | -0.11       | 0.08        | 0.09        | <b>0.25</b>  | <b>0.25</b>  | 4.08         | 3.29         | <b>0.30</b>  | <b>0.30</b>  | <b>0.14</b>  | <b>-0.10</b> |
| G783      | 9RHL593           | -0.16       | -0.13       | 0.06        | 0.07        | <b>0.22</b>  | <b>0.22</b>  | 4.39         | 3.18         | <b>0.23</b>  | <b>0.23</b>  | <b>0.14</b>  | <b>0.00</b>  |
| G4096     | 9RHL593           | -0.18       | -0.16       | 0.02        | 0.04        | <b>0.25</b>  | <b>0.25</b>  | 3.99         | 2.91         | 0.63         | 0.63         | 0.62         | <b>-0.01</b> |
| G853      | 9RHL593           | -0.20       | -0.17       | 0.07        | 0.09        | <b>0.38</b>  | <b>0.38</b>  | 3.88         | 3.22         | 0.44         | 0.44         | <b>0.38</b>  | <b>-0.16</b> |
| G4141     | 5ZCV995           | -0.02       | -0.14       | 0.07        | -0.07       | <b>0.00</b>  | 0.79         | 1.27         | 4.00         | <b>0.00</b>  | 0.55         | <b>-0.01</b> | 2.97         |
| G4231     | 5ZCV995           | 0.07        | -0.10       | -0.04       | -0.05       | <b>0.00</b>  | 2.89         | <b>0.00</b>  | 3.46         | 2.77         | 2.77         | 2.34         | 2.76         |
| G4220**   | 5ZCV995           | -0.01       | -0.08       | 0.00        | -0.01       | <b>0.00</b>  | 1.14         | 0.68         | 4.13         | <b>0.00</b>  | 1.33         | <b>0.32</b>  | 2.62         |
| G5199     | 5ZCV995           | 0.07        | -0.05       | 0.09        | 0.04        | <b>-0.06</b> | <b>-0.06</b> | 0.85         | 2.51         | 0.50         | 0.50         | <b>0.00</b>  | <b>0.18</b>  |
| G5336     | 5ZCV995           | -0.06       | -0.10       | -0.04       | -0.06       | <b>0.00</b>  | 0.60         | 0.65         | 3.29         | 1.02         | 1.02         | <b>0.00</b>  | 1.99         |
| NA12750   | 5ZCV995           | -0.04       | -0.09       | -0.04       | -0.07       | <b>0.00</b>  | <b>0.19</b>  | <b>-0.20</b> | 3.46         | <b>0.00</b>  | 0.44         | <b>-0.47</b> | 2.41         |
| G2977     | 6KAE204           | -0.02       | -0.05       | -0.03       | 0.01        | <b>0.00</b>  | 3.18         | 4.39         | 2.34         | 2.84         | 2.84         | 2.91         | 2.19         |
| G1882     | 1DXJ626           | 0.02        | -0.07       | -0.07       | -0.02       | <b>0.00</b>  | 2.80         | 1.42         | 3.49         | 2.90         | 2.90         | 3.06         | 2.34         |
| G2504     | 1DXJ626           | 0.05        | -0.05       | -0.03       | -0.01       | <b>0.00</b>  | 1.11         | <b>-0.03</b> | 2.07         | 1.14         | 1.14         | 1.25         | 0.53         |
| G503      | 6PKP514           | <b>0.11</b> | 0.07        | 0.08        | <b>0.12</b> | 0.67         | 0.67         | <b>-0.06</b> | <b>-0.41</b> | 0.61         | 0.61         | 0.61         | <b>-0.09</b> |
| G5728     | 6PKP514           | <b>0.16</b> | -0.01       | <b>0.16</b> | <b>0.10</b> | 1.18         | 1.18         | 0.11         | 1.76         | 0.60         | 0.60         | <b>0.04</b>  | <b>0.30</b>  |
| G257      | 6PKP514           | 0.05        | 0.06        | 0.02        | 0.04        | <b>0.00</b>  | 1.18         | 0.00         | 2.03         | 1.46         | 1.46         | 1.37         | 0.78         |
| G4695     | 3FQM386           | 0.01        | 0.02        | 0.09        | <b>0.10</b> | 1.18         | 1.18         | 2.58         | 1.96         | 0.72         | 0.72         | 0.67         | <b>0.00</b>  |
| G4366     | 0VXC556           | -0.12       | -0.11       | -0.09       | -0.06       | <b>0.00</b>  | 1.37         | 3.54         | 1.49         | 1.50         | 1.50         | 1.70         | 0.56         |
| G150      | 0VXC556           | -0.18       | -0.07       | -0.05       | -0.01       | <b>0.00</b>  | 2.64         | 4.64         | 2.34         | 2.66         | 2.66         | 2.83         | 1.93         |
| G6019     | 3ECO791           | 0.09        | -0.07       | <b>0.16</b> | <b>0.11</b> | 0.83         | 0.83         | 1.47         | 3.12         | 0.96         | 0.96         | <b>0.39</b>  | <b>0.38</b>  |
| G4651     | cherry_pick_redo1 | 0.09        | -0.02       | <b>0.14</b> | <b>0.11</b> | <b>0.00</b>  | 1.72         | 1.67         | 3.93         | 1.16         | 1.16         | 0.71         | 0.64         |

\*This sample was removed from the analyses due to low call rate

\*\*This sample was removed from the analyses due to sex misspecification

Table S1.

Problem GoKinD samples identified by SQC and CQC tests. The problem samples discussed above appear in the top eight rows. Shaded rows next to them correspond to additional failed samples identified by all four variants of the tests. Figures in boldface correspond to score values meeting the threshold for sample removal for a specific QC test.
